# Supplementary material for: Cep164, a novel centriole appendage protein required for primary cilium formation
Source: PubMed Central journal article supplement — J Cell Biol. 2007 Oct 22;179(2):321–30. doi: 10.1083/jcb.200707181 (PMC2064767; doi:10.1083/jcb.200707181), 2007-10-22
Supplement: jcellbiol_jcb.200707181_3.pdf [file jcellbiol_jcb.200707181_3.pdf]

Table S1. A summary of proteins tested for involvement in PC formation, siRNA target sequences, and methods used to monitor successful depletion

| Protein      | siRNA oligonucleotides                                                   | ≥50% depletion monitored via  |
|--------------|--------------------------------------------------------------------------|-------------------------------|
| ALMS1        | 5'-CCCTATGATGACTGTCATAAA-3' (342),<br>5'-CAGAACTTTATACCTGATGAA-3' (343)  | IF                            |
| BBS4         | 5'-AAGGCACAAGACCAGTTGCAC-3'                                              | Kim et al., 2004              |
| CAP350       | 5'-ATGAACGATATCAGTGCTATA-3'                                              | Yan et al., 2006              |
| CCCAP        | 5'-GACCTTGTTCATACTATTAAT-3' (288),<br>5'-GAGGAACGACTTAGCTGAATA-3' (289)  | qRT-PCR                       |
| centrin-2    | 5'-AAGAGCAAAAAGCAGGAGATCC-3'                                             | Salisbury et al., 2002        |
| centrin-3    | 5'-CTGGTGACATTTAAAGAATTA-3'                                              | IF                            |
| Cep131       | 5'-CCCCTCAGCCCAGCAATA-3' (272),<br>5'-CAGCACGAGCTGGAGATTA-3' (273)       | qRT-PCR                       |
| Cep135       | 5'-AAAGCTTATTGCTCATTTAAA-3' (274),<br>5'-AAGCAGATTGAGCTAAGAGAA-3' (275)  | qRT-PCR, IF                   |
| Cep152       | 5'-GCGGATCCAAGTGGAAATCTA-3' (277)                                        | qRT-PCR                       |
| Cep164       | 5'-CAGGTGACATTTACTATTTCA-3' (278),<br>5'-ACCACTGGGAATAGAAGACAA-3' (279)  | qRT-PCR, IF                   |
| Cep170       | 5'-GAAGGAATCCTCCAAGTCA-3'                                                | Guarguaglini et al., 2005     |
| Cep192       | 5'-AACAGTGAATGTGCAAGTAAA-3' (281)                                        | qRT-PCR                       |
| Cep215       | 5'-GTGGAAGATCTCCTAACTAAA-3' (283)                                        | qRT-PCR, IF                   |
| Cep27        | 5'-CAGCAGATCACAAATATTCAA-3' (254),<br>5'-CTGAAGAAAAGTTATCTTTATA-3' (255) | qRT-PCR                       |
| Cep290       | 5'-TAGCCTCGAAAGACTAGTTAA-3' (285)                                        | qRT-PCR, IF                   |
| Cep41        | 5'-TCCATGTTAGATGGACAGAAA-3' (256),<br>5'-CACTGGTAACAGTATGACTAA-3' (257)  | qRT-PCR                       |
| Cep57        | 5'-AACCAAATAACTAAAGTTCGA-3' (258),<br>5'-AGCCATCAAGGTCTAATGGAA-3' (259)  | qRT-PCR                       |
| Cep63        | 5'-CAACGCTTGATTTATCAGCAA-3' (260),<br>5'-CAGCCTTAAAGTAGCCTCTTA-3' (261)  | qRT-PCR                       |
| Cep68        | 5'-CACCTCAAATCACCTACTAA-3' (262),<br>5'-ACCGAAGATGATCCATCCCTA-3' (263)   | qRT-PCR, IF                   |
| Cep70        | 5'-CCGGCGACTGAGTAAGATGAA-3' (264),<br>5'-GAAGATCGCATTGCTACTCAA-3' (265)  | qRT-PCR                       |
| Cep72        | 5'-AGAGCTATGTATGATAATTAA-3' (266)                                        | qRT-PCR                       |
| Cep76        | 5'-CTCGGTATTATAGGGCCAATA-3' (268),<br>5'-AAGGGTTTGAGCCCTAGACAA-3' (269)  | qRT-PCR                       |
| Cep78        | 5'-CAGTTGTGTAAGCTCTTAAA-3' (270),<br>5'-TACACACTTATTGGTGACCTA-3' (271)   | qRT-PCR                       |
| chTOG        | 5'-AAGAGCCCAGAGTGGTCCAAA-3'                                              | Cassimeris and Morabito, 2004 |
| C-Nap1       | 5'-CTGGAAGAGCGTCTAACTGAT-3'                                              | Bahe et al., 2005             |
| CP110        | 5'-CCCGAAATTATGCCAAAGTTA-3' (290),<br>5'-TAGACTTATGCAGACAGATAA-3' (291)  | qRT-PCR                       |
| CPAP         | 5'-AAGGAAGATTGCACCAGTCAA-3' (250),<br>5'-CCCAATGGAACTCGAAAGGAA-3' (251)  | qRT-PCR, IF                   |
| Dynammin2    | 5'-AAGAGTTCGGTGTCTCGAGAAC-3'                                             | Thompson et al., 2004         |
| FOP*         | 5'-AAGTGATCAGGCGCTGTCAAC-3'                                              | Yan et al., 2006              |
| hSAS6        | 5'-AAGCACGTTAATCAGCTACAA-3'                                              | Leidel et al., 2005           |
| NA14         | 5'-TGGCCTGTGATTATGAATAAA-3' (286),<br>5'-CTCCTCACACAGAACCCAA-3' (287)    | qRT-PCR                       |
| Nek2         | 5'-AACATGAGATGTGACATTCTA-3' (252),<br>5'-TTACGAGGATGTTAACTTAA-3' (253)   | qRT-PCR, IF                   |
| ninein       | 5'-GCGGAGCTCTCTGAAGTAAA-3'                                               | IF                            |
| Nlp          | 5'-CACACTGGAAATTGTACTATA-3' (249)                                        | IF                            |
| Odf2         | 5'-AAGGATCTTTATGTCGCTGAA-3'                                              | IF                            |
| OFD-1        | 5'-CTCAGACAAGTTCGACATTTA-3' (339)                                        | IF                            |
| PCM-1        | 5'-AATCAGCTTCGTGATTCTCAG-3'                                              | Dammermann and Merdes, 2002   |
| pericentrin* | 5'-AAGCAGCTGAGCTGAAGGAGA-3'                                              | Dammermann and Merdes, 2002   |
| Plk4         | 5'-CTGGTAGTACTAGTTCACCTA-3'                                              | Habedanck et al., 2005        |
| rootletin*   | 5'-AAGCCAGTCTAGACAAGGA-3'                                                | Bahe et al., 2005             |
| Sfi1p        | 5'-CTGCTGTGCAAATGTATCGAA-3'                                              | qRT-PCR, IF                   |

siRNA oligonucleotides were from QIAGEN unless marked by \*, in which case they were from Dharmacon. IF, immunofluorescence microscopy; qRT-PCR, quantitative RT-PCR.

#### References

- Cassimeris, L., and J. Morabito. 2004. TOGp, the human homolog of XMAP215/Dis1, is required for centrosome integrity, spindle pole organization, and bipolar spindle assembly. *Mol. Biol. Cell.* 15:1580–1590.
- Dammermann, A., and A. Merdes. 2002. Assembly of centrosomal proteins and microtubule organization depends on PCM-1. *J. Cell Biol.* 159:255–266.
- Kim, J.C., J.L. Badano, S. Sibold, M.A. Esmail, J. Hill, B.E. Hoskins, C.C. Leitch, K. Venner, S.J. Ansley, A.J. Ross, et al. 2004. The Bardet-Biedl protein BBS4 targets cargo to the pericentriolar region and is required for microtubule anchoring and cell cycle progression. *Nat. Genet.* 36:462–470.
- Leidel, S., M. Delattre, L. Cerutti, K. Baumer, and P. Gonczy. 2005. SAS-6 defines a protein family required for centrosome duplication in *C. elegans* and in human cells. *Nat. Cell Biol.* 7:115–125.
- Thompson, H.M., H. Cao, J. Chen, U. Euteneuer, and M.A. McNiven. 2004. Dynammin 2 binds gamma-tubulin and participates in centrosome cohesion. *Nat. Cell Biol.* 6:335–342.
- Yan, X., R. Habedanck, and E.A. Nigg. 2006. A complex of two centrosomal proteins, CAP350 and FOP, cooperates with EB1 in microtubule anchoring. *Mol. Biol. Cell.* 17:634–644.
